# Supplementary material for: HPV8 Field Cancerization in a Transgenic Mouse Model Is due to Lrig1+ Keratinocyte Stem Cell Expansion
Source: PubMed Central journal article supplement — J Invest Dermatol. 2017 Oct;137(10):2208–16. doi: 10.1016/j.jid.2017.04.039 (PMC5613749; doi:10.1016/j.jid.2017.04.039), 2017-10
Supplement: mmc1.pdf [file mmc1.pdf]

# Supplementary Information

## **HPV8 Field Cancerization in a Transgenic Mouse Model is due to Lrig1+ Keratinocyte Stem Cell Expansion**

Simone Lanfredini<sup>1\*</sup>, Carlotta Olivero<sup>2\*</sup>, Cinzia Borgogna<sup>2</sup>, Federica Calati<sup>2</sup>, Kathryn Powell<sup>1</sup>, Kelli-Jo Davies<sup>1</sup>, Marco De Andrea<sup>2,3</sup>, Sarah Harries<sup>1</sup>, Hiu Kwan Carolyn Tang<sup>1</sup>, Herbert Pfister<sup>4</sup>, Marisa Gariglio<sup>2</sup>, Girish K Patel<sup>1</sup>.

1. European Cancer Stem Cell Research Institute, School of Biosciences, Cardiff University, Maindy Road, Cardiff, UK
2. Virology Unit, Department of Translational Medicine, Novara Medical School, Novara, Italy
3. Viral Pathogenesis Unit, Department of Public Health and Pediatric Sciences, Turin Medical School, Turin, Italy
4. Institute of Virology, University of Cologne, Cologne, Germany

\* The first two authors contributed equally to this work.

\*\* Marisa Gariglio and Girish K Patel are joint senior authors.

Reprint request and correspondence to: Dr Girish K Patel MD, European Cancer Stem Cell Research Institute, School of Biosciences, Cardiff University, Maindy Road, Cardiff, CF24 4HQ, UK. E-mail: patelgk@cardiff.ac.uk

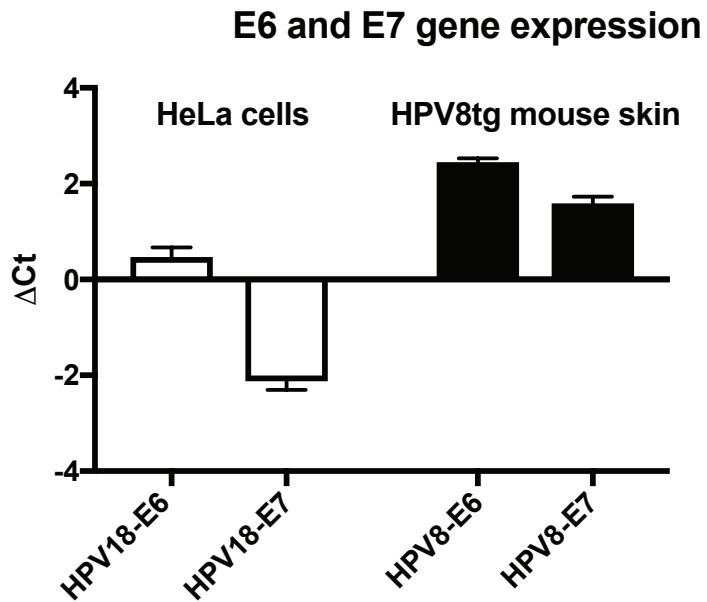

**Supplementary Figure S1: Expression of E6 and E7 genes of HPV8 and HPV18 in HPV8tg mouse skin and HeLa cells respectively.**

qRT-PCR of E6 and E7 genes from RNA isolated from HeLa cells and HPV8tg mouse skin, relative to  $\beta$ -Actin, with mean  $\pm$  SD.

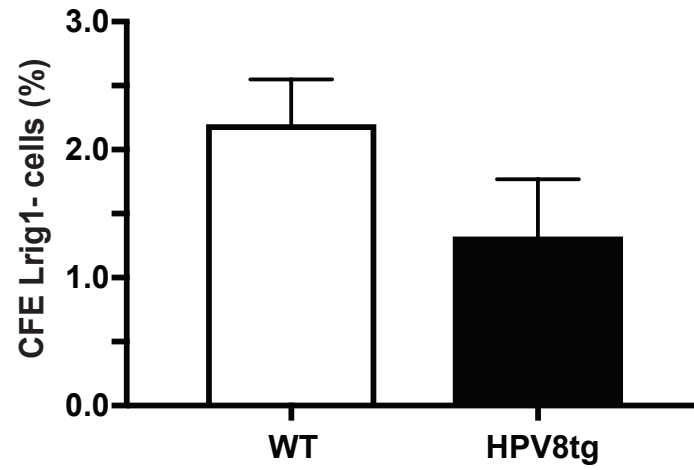

**Supplementary Figure S2: Colony forming efficiency from the flow sorted Lrig1 negative keratinocyte populations**

Keratinocyte colony forming assays from flow sorted Lrig1 negative cells from WT and HPV8tg (n=6) skin dissociates, with mean $\pm$ SD.

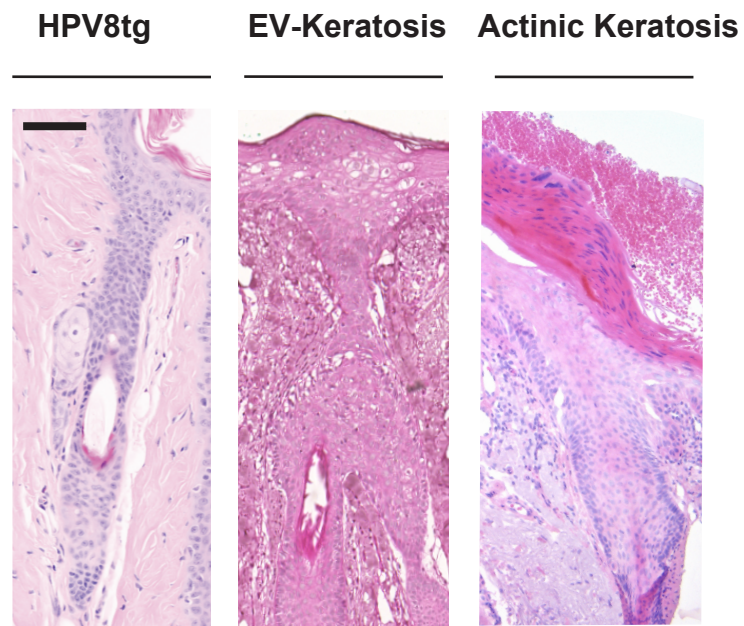

**Supplementary Figure S3: H&E staining on HPV8tg mouse skin, EV-Keratosis and Actinic Keratosis**

Hematoxylin and eosin staining of paraffin embedded skin sections from HPV8tg mouse, EV-Keratosis and Actinic Keratosis corresponding to figure 5d. Scale bar is 100 $\mu$ m.

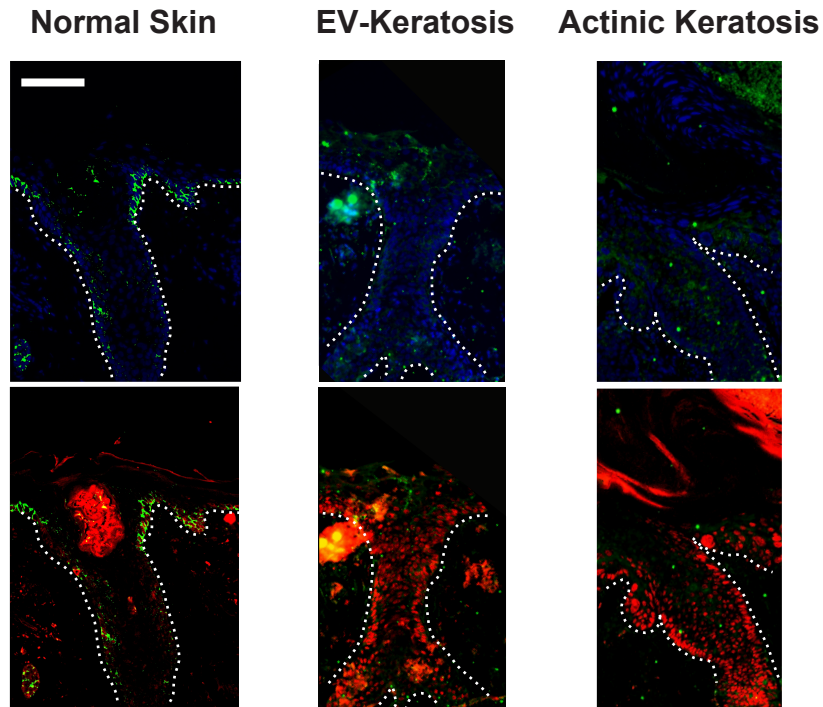

**Supplementary Figure S4: Lrig1 immunolabelling of human skin, EV Keratosis and Actinic Keratosis.**

Lrig1 (green) and p63 (red) immunofluorescent immunolabelling of formalin fixed paraffin embedded tissue sections from normal human skin, EV Keratosis and Actinic Keratosis corresponding to figure 5d. The sections were counter stained with DAPI (blue). Scale bar is 100 $\mu$ m.

**Supplementary Table S1: Summary of EV patient lesions**

| EV patient | EVER 1/2 genetics              | T-Cell phenotype <sup>1</sup>                | Year of birth | Nature of lesion <sup>2</sup> | Anatomic site  | Year of lesion excision | References |
|------------|--------------------------------|----------------------------------------------|---------------|-------------------------------|----------------|-------------------------|------------|
| 1          | WT                             | Slightly low CD3<br>Normal CD4<br>Low CD8    | 1967          | Wart-like lesion              | forearm        | 2003                    | 1,2        |
|            |                                |                                              |               | SCC                           | temple         | 2003                    |            |
|            |                                |                                              |               | SCC                           | forehead       | 2003                    |            |
|            |                                |                                              |               | AK                            | elbow          | 2003                    |            |
|            |                                |                                              |               | Bowenoid lesion               | forehead       | 2003                    |            |
| 2          | WT                             | Normal CD3<br>Slightly low CD4<br>Normal CD8 | 1947          | Wart-like lesion              | forearm        | 2005                    | 2,3        |
|            |                                |                                              |               |                               |                |                         |            |
| 3          | WT                             | Low CD3<br>Low CD4<br>Normal CD8             | 1969          | SCC                           | temple         | 1999                    | 2          |
|            |                                |                                              |               | Bowenoid lesion               | temple         | 1999                    |            |
|            |                                |                                              |               | Wart-like lesion              | forearm        | 1999                    |            |
| 4          | EVER 2 mutation (p.Y109fsX118) | Normal CD3<br>Normal CD4<br>Normal CD8       | 1948          | Bowenoid lesion               | back           | 1990                    | 2,4,5      |
|            |                                |                                              |               | SCC                           | eyelid         | 1993                    |            |
|            |                                |                                              |               | BCC                           | eyelid         | 2007                    |            |
|            |                                |                                              |               | SCC/AK                        | cheek bone     | 2007                    |            |
|            |                                |                                              |               | SCC                           | temple         | 2008                    |            |
|            |                                |                                              |               | SCC                           | eyelid         | 2008                    |            |
|            |                                |                                              |               | SCC                           | nose           | 2008                    |            |
|            |                                |                                              |               | SCC                           | nose           | 2008                    |            |
|            |                                |                                              |               | AK                            | eyelid         | 2008                    |            |
| SCC        | nose                           | 2008                                         |               |                               |                |                         |            |
| 5          | EVER 2 mutation (p.V191fsX226) | Normal CD3<br>Normal CD4<br>Normal CD8       | 1952          | Bowenoid lesion               | temple         | 2005                    | 4,5        |
|            |                                |                                              |               | Bowenoid lesion               | ear            | 2005                    |            |
|            |                                |                                              |               | Bowenoid lesion               | forehead       | 2007                    |            |
|            |                                |                                              |               | Keratosis                     | lower lip      | 2007                    |            |
|            |                                |                                              |               | SK                            | back           | 2007                    |            |
|            |                                |                                              |               | Keratosis                     | back           | 2007                    |            |
|            |                                |                                              |               | AK                            | scalp          | 2007                    |            |
|            |                                |                                              |               | SCC                           | scalp          | 2008                    |            |
|            |                                |                                              |               | Bowenoid lesion               | neck           | 2008                    |            |
|            |                                |                                              |               | SCC                           | scalp          | 2008                    |            |
|            |                                |                                              |               | SCC                           | nose           | 2008                    |            |
|            |                                |                                              |               | SCC                           | ear            | 2008                    |            |
|            |                                |                                              |               | Bowenoid lesion               | lower lip      | 2008                    |            |
| 6          | WT                             | Normal CD3<br>Low CD4<br>Normal CD8          | 1958          | Wart-like lesion              | leg            | 1991                    | 6          |
|            |                                |                                              |               | Wart-like lesion              | dorsum of hand | 1991                    |            |
|            |                                |                                              |               | Wart-like lesion              | leg            | 1991                    |            |
|            |                                |                                              |               | Skin fibroma                  | armpit         | 1997                    |            |
|            |                                |                                              |               | Wart-like lesion              | elbow          | 2003                    |            |
|            |                                |                                              |               | Wart-like lesion              | elbow          | 2005                    |            |
|            |                                |                                              |               | AK                            | temple         | 2006                    |            |
|            |                                |                                              |               | Bowenoid lesion               | scapula        | 2008                    |            |
|            |                                |                                              |               | SCC                           | forehead       | 2010                    |            |
|            |                                |                                              |               | SCC                           | forehead       | 2010                    |            |
|            |                                |                                              |               | Bowenoid lesion               | temple         | 2010                    |            |
| AK         | temple                         | 2010                                         |               |                               |                |                         |            |

<sup>1</sup>Slightly low = greater than 20% but less than 50% reduction in total count; low = less than 50% reduction in total count

<sup>2</sup>SCC (Squamous Cell Carcinoma), BCC (Basal Cell Carcinoma), AK (Actinic Keratosis), SK (Seborrheic Keratosis).

**Supplementary Table S2: Antibody list:**

| <b>Antibody</b>   | <b>Cat.No</b> | <b>Company</b>          | <b>Technique</b> |
|-------------------|---------------|-------------------------|------------------|
| K15               | MA1-90929     | ThermoFisher Scientific | WM               |
| Ki67              | ab16667       | Abcam                   | WM               |
| LGR6              | ab12747       | Abcam                   | WM               |
| LGR5              | NLS1236       | Novus Biologicals       | WM               |
| CD34 (RAM34)      | 553731        | BD Pharmingen           | WM               |
| CD34              | 560230        | BD Pharmingen           | FACS             |
| Lrig1 (C2C3)      | GTX119485     | GeneTex                 | IF               |
| Lrig1             | AF3688        | R&D Systems             | WM               |
| Lrig1             | FAB3688G      | R&D Systems             | FACS             |
| p63 (BC4A4)       | ab735         | Abcam                   | IF               |
| K14               | ab130102      | Abcam                   | IF               |
| $\beta$ -HPV E4   |               | *                       | IF               |
| p63 ( $\Delta$ N) | 619002        | Biolegend               | WB               |
| p63 (TA)          | 618902        | Biolegend               | WB               |
| GAPDH             | MAB374        | Millipore               | WB               |

\*E4  $\beta$ -HPV antibody was kindly provided by John Doorbar, University of Cambridge-UK.

**Supplementary Table S3: RT-PCR primers:**

|               |                                 |
|---------------|---------------------------------|
| mΔNp63 fw     | 5' ATGTTGTACCTGGAAAACAATG 3'    |
| mΔNp63 rev    | 5' GATGGAGAGAGGGGCATCAAA 3'     |
| mTAp63 fw     | 5' AGACAAGCGAGTTCCTCAGC 3'      |
| mTAp63 rev    | 5' TGCGGATACAATCCATGCTA 3'      |
| HPV8-E6 fw    | 5' GCGGCTTTAGGTATTCCATTGC 3'    |
| HPV8-E6 rev   | 5' GCTACACAACAACAACGACAACACG 3' |
| HPV8-E7 fw    | 5' CCTGAAGTGTTACCAGTTGACCTGC 3' |
| HPV8-E7 rev   | 5' CAGTTGCGTTGACAAAAAGACG 3'    |
| mβ-actin fw   | 5' CCAGAGCAAGAGAGGTATCCTGAC 3'  |
| mβ-actin rev  | 5' CATTGTAGAAGGTGTGGTGCCAG 3'   |
| mGAPDH fw     | 5' TGTCAGCAATGCATCCTGCA 3'      |
| mGAPDH rev    | 5' TGTATGCAGGGATGATGTTC 3'      |
| HPV18-E6 fw*  | 5' GTGCCAGAAACCGTTGAATC 3'      |
| HPV18-E6 rev* | 5' TTGTGTTTCTCTGCGTCGTT 3'      |
| HPV18-E7 fw*  | 5' TGAAATTCCGGTTGACCTTC 3'      |
| HPV18-E7 rev* | 5' CACGGACACACAAAGGACAG 3'      |

\*Lo Cigno I, De Andrea M, Borgogna C, Albertini S, Landini MM, Peretti A, Johnson KE, Chandran B, Landolfo S, Gariglio M. The Nuclear DNA Sensor IFI16 Acts as a Restriction Factor for Human Papillomavirus Replication through Epigenetic Modifications of the Viral Promoters. J Virol. 2015 Aug;89(15):7506-20.

**Supplementary Table S4: Taqman primers:**

|             |               |
|-------------|---------------|
| ΔNp63       | Mm01169470_m1 |
| TAp63       | Mm01150797_m1 |
| Tmc6- EVER1 | Mm00520751_m1 |
| Tmc8- EVER2 | Mm01241000_m1 |
| β-actin     | Mm02619580_g1 |
| GAPDH       | Mm99999915_g1 |
